# Supplementary material
Source: HighWire-hosted journal article supplement (http://www.cmaj.ca/highwire/filestream/81635/field_highwire_adjunct_files/1/210929-res-2-at.pdf)
Supplement: 210929-res-2-at.pdf [file 210929-res-2-at.pdf]

1 **Supplement 2: Original Dutch quotes from participant interviews about the**  
 2 **definition of IPS**  
 3

| <b>Original Dutch version of table 2: quotes from participant interviews about the definition of IPS</b> |                                                                                                                                                                                                                                                                                                                                                                                                            |
|----------------------------------------------------------------------------------------------------------|------------------------------------------------------------------------------------------------------------------------------------------------------------------------------------------------------------------------------------------------------------------------------------------------------------------------------------------------------------------------------------------------------------|
| <b>#</b>                                                                                                 | <b>Quote</b>                                                                                                                                                                                                                                                                                                                                                                                               |
| 1                                                                                                        | <i>“Op het moment dat iemand zegt: ik heb een chronische stoornis, die niet overgaat, vinden jullie allemaal als experts en ik lijd daaronder, dan heb je uitzichtloos lijden” - P6</i>                                                                                                                                                                                                                    |
| 2                                                                                                        | <i>“[We kennen allemaal] voorbeelden (...) van mensen die we feitelijk, vanwege (...) niet op medicatie of wat dan ook reagerende depressies, min of meer, opgegeven hebben (...). En dan een paar jaar later, tot je stomme verbazing, heeft iemand zijn draai gevonden en gaat het eigenlijk allemaal wel weer. Dat maakt het [vaststellen van uitzichtloos psychisch lijden] heel erg lastig. - P11</i> |
| 3                                                                                                        | <i>“als iemand (...) alles doorlopen heeft en dat er niet iets is waarvan je kan zeggen van nou: als je nou dat doet, dan wordt het anders” – P5</i>                                                                                                                                                                                                                                                       |
| 4                                                                                                        | <i>“Dat is volgens mij hele ingewikkelde [van het vaststellen van uitzichtloosheid in de psychiatrie], bij kanker weet je gewoon, die chemokuur doet niets meer en we hebben geen andere en dan gaat die tumor verder groeien en dan houdt het gewoon een keertje op. - P2</i>                                                                                                                             |
| 5                                                                                                        | <i>(Hyperbolisch) Ik denk dat als eenzelfde patiënt door 10 [psychiaters] wordt gezien, dat je dan 10 hele andere brieven krijgt [die de patiënt beschrijven en een oordeel geven over uitzichtloosheid]. – P7</i>                                                                                                                                                                                         |
| 6                                                                                                        | <i>“we moeten gewoon accepteren dat er een zekere mate van onzekerheid blijft. Op het moment dat ik als SCEN-arts zeg; ik denk dat aan de wettelijke criteria voldaan is, ja dan zit daar een onzekerheid. Daar zit een betrouwbaarheidsinterval omheen. (...) Maar omdat het ook over een dichotoom iets gaat. Dood en leven. En de mens wil absolute 100% zekerheid (...) en dat kan niet.”- P8</i>      |

| <b>Original Dutch version of table 3: Original Dutch quotes from participant interviews about the definition of IPS</b> |                                                                                                                                                                                                                                                                                                                                                                                                                                                                                                                                                                                                 |
|-------------------------------------------------------------------------------------------------------------------------|-------------------------------------------------------------------------------------------------------------------------------------------------------------------------------------------------------------------------------------------------------------------------------------------------------------------------------------------------------------------------------------------------------------------------------------------------------------------------------------------------------------------------------------------------------------------------------------------------|
| #                                                                                                                       | Quote                                                                                                                                                                                                                                                                                                                                                                                                                                                                                                                                                                                           |
| 1                                                                                                                       | <i>"De meeste mensen die op psychische gronden euthanasie verzoeken lijden niet aan één stoornis. (...) [Bijvoorbeeld de volgende patiënt]: ze klaagt met name over depressie, ze is een adolescent, ze is getraumatiseerd (...) maar die conversie was al van daarvoor. De systeemproblematiek: er is een symbiotische relatie met de andere ouder. (...) Het gaat erom: wie is het beste toegerust om deze individuele patiënt te beoordelen? (...) En in feite denk ik dat het vaak beter is om een generalistisch perspectief te hebben dan een focus op één van die stoornissen. – P10</i> |
| 2                                                                                                                       | <i>"Laatst [zag ik] een zeer ernstige sociaal fobische vrouw, die volledig vastgelopen was in haar leven (...) [na aanvullende diagnostiek] blijkt ze autistisch te zijn. (...) Ik denk dan ook meteen: ja, dit is ook maar een conclusie van een aantal vragenlijsten of interviews of het hangt er ook net af hoe iemand dan antwoord geeft, waar hij nadruk op legt, hoe de zaak wordt geïnterpreteerd." – P1</i>                                                                                                                                                                            |
| 3                                                                                                                       | <i>"Je gaat dan meer kijken naar doelen die gesteld zijn, zijn die doelen gehaald? Was er voldoende commitment toen? Was de patiënt gemotiveerd? Je gaat dan ook meer naar de inhoud kijken en/of die patiënt dan ook bevragen daarop. – P9</i>                                                                                                                                                                                                                                                                                                                                                 |
| 4                                                                                                                       | <i>"Wat we natuurlijk meestal doen, bijvoorbeeld voor een stemmingsstoornis, dan lees ik in alle correspondentie of hoor ik van de patiënt of de gebruikelijke stappen uit de richtlijnen gevolgd zijn - P8</i>                                                                                                                                                                                                                                                                                                                                                                                 |
| 5                                                                                                                       | <i>"Dat soort therapieën geven toch een andere dimensie aan de beleving van de patiënt, de ommekeer van alles moet weer terug naar het oude niveau van vroeger, toen ik nog niet ziek was of alles nog kon, tot een nieuwe fase van leven met beperkingen." - P9</i>                                                                                                                                                                                                                                                                                                                            |

|    |                                                                                                                                                                                                                                                                                                                                                                                                                                                          |
|----|----------------------------------------------------------------------------------------------------------------------------------------------------------------------------------------------------------------------------------------------------------------------------------------------------------------------------------------------------------------------------------------------------------------------------------------------------------|
| 6  | <i>“In de psychiatrie is het eigenlijk bijna nooit zo dat er helemaal geen behandelopties zijn. Al is het maar: herstelgerichte behandeling of ondersteunende zorg of langdurige klinische zorg met dagbesteding. Ik bedoel er is altijd wel iets van zorg. Want mensen gaan er meestal niet vanzelf dood aan. – P10</i>                                                                                                                                 |
| 7  | <i>“In de psychiatrie is het bijna nooit te voorspellen. (...) Tegelijkertijd denk ik: dat is ook een beetje laf om steeds te zeggen [dat er nog behandelopties zijn], want dan kan niemand verder. (...) Ik vind dat je daar mensen niet mee helpt, met zo’n standpunt” – P7</i>                                                                                                                                                                        |
| 8  | <i>“Hij was het gewoon beu, hij was het gewoon zat, hij dacht [een nieuwe behandeling] heeft toch helemaal geen zin?” - P1</i>                                                                                                                                                                                                                                                                                                                           |
| 9  | <i>“We hebben dan allemaal zogenaamde evidence-based behandelingen, maar dat wil niet zeggen dat mensen daarvan kunnen profiteren als ze dat bijvoorbeeld zelf niet willen. Dat is nooit evidence-based aangetoond, dat een behandeling effectief kan zijn als iemand die behandeling helemaal niet wil. Even los van of ie dan wel uitvoerbaar is. Dus ik vind dat daar wel een groot spanningsveld ligt waar ons vak geen antwoord op heeft.” - P4</i> |
| 10 | <i>“ik denk dat de motivatie van iemand kan worden beïnvloed, omdat euthanasie een reële mogelijkheid kan blijken te zijn als het allemaal niet werkt. En als je er als patiënt erop durft te vertrouwen dat die mogelijkheid er is aan het eind van de tunnel, dan ga je die tunnel misschien langer door.” - P10</i>                                                                                                                                   |
| 11 | <i>“Als er een reële behandelbaarheid bestaat die binnen redelijke termijn uitvoerbaar is, en iemand weigert dat: ja, dan vind ik het ook redelijk dat de procedure stopt.” - P4</i>                                                                                                                                                                                                                                                                     |
| 12 | <i>“Ik denk dat dat dus heel erg dat wegen is. Dat wegen van factoren van wat zou er nog kunnen gebeuren? En de behandelbaarheid? En wat moet iemand daar dan voor doen? En weegt dat dan op tegen het eventueel te verwachten effect? En na</i>                                                                                                                                                                                                         |

|                                                                                                                                                                                     |
|-------------------------------------------------------------------------------------------------------------------------------------------------------------------------------------|
| <p><i>hoeveel tijd kun je dat dan verwachten? En daar ook in meewegend de<br/>voorgeschiedenis van iemand, datgene dat er al geprobeerd is, zijn<br/>veranderbaarheid” – P1</i></p> |
|-------------------------------------------------------------------------------------------------------------------------------------------------------------------------------------|

1
